# Supplementary material for: The DiPEP study: an observational study of the diagnostic accuracy of clinical assessment, D‐dimer and chest x‐ray for suspected pulmonary embolism in pregnancy and postpartum
Source: PubMed Central journal article supplement — BJOG. 2018 Jun 14;126(3):383–92. doi: 10.1111/1471-0528.15286 (PMC6519154; doi:10.1111/1471-0528.15286), 2018-06-14
Supplement: BJO-126-383-s003.pdf [file BJO-126-383-s003.pdf]

**Table S1:** Characteristics of the study groups

| Characteristic                |                                    | Diagnosed PE<br>(N=198) | Recruited<br>suspected PE<br>(N=324) | Non recruited<br>suspected PE<br>(N=95) |
|-------------------------------|------------------------------------|-------------------------|--------------------------------------|-----------------------------------------|
| Mean age (years)              |                                    | 30.1                    | 29.3                                 | 30.0                                    |
| Mean BMI (kg/m <sup>2</sup> ) |                                    | 28.3                    | 28.0                                 | 28.7                                    |
| Ethnic group                  | White British                      | 151 (76.3%)             | 204 (63.0%)                          | 50 (52.6%)                              |
|                               | White Irish                        | 4 (2.0%)                | -                                    | -                                       |
|                               | White Other                        | 9 (4.5%)                | 18 (5.6%)                            | 5 (5.3%)                                |
|                               | Mixed white and black<br>Caribbean | -                       | 3 (0.9%)                             | -                                       |
|                               | Mixed white and black<br>African   | -                       | 2 (0.6%)                             | -                                       |
|                               | Mixed white and<br>Asian           | -                       | 2 (0.6%)                             | -                                       |
|                               | Mixed other                        | -                       | 1 (0.3%)                             | -                                       |
|                               | Asian Indian                       | 4 (2.0%)                | 6 (1.9%)                             | 4 (4.2%)                                |
|                               | Asian Pakistani                    | 7 (3.5%)                | 36 (11.1%)                           | 15 (15.8%)                              |
|                               | Asian Bangladeshi                  | 1 (0.5%)                | 19 (5.9%)                            | 3 (3.2%)                                |
|                               | Asian other                        | 3 (1.5%)                | 5 (1.5%)                             | 5 (5.3%)                                |
|                               | Black Caribbean                    | 4 (2.0%)                | 5 (1.5%)                             | 2 (2.1%)                                |
|                               | Black African                      | 9 (4.5%)                | 17 (5.2%)                            | 6 (6.3%)                                |
|                               | Black other                        | -                       | 4 (1.2%)                             | 1 (1.1%)                                |
|                               | Chinese                            | -                       | -                                    | -                                       |
|                               | Other                              | 3 (1.5%)                | 2 (0.6%)                             | 2 (2.1%)                                |

|                                         |            |             |             |            |
|-----------------------------------------|------------|-------------|-------------|------------|
|                                         | Missing    | 3 (1.5%)    | -           | 2 (2.1%)   |
| Marital status                          | Cohabiting | 67 (33.8%)  | 87 (26.9%)  | 29 (30.5%) |
|                                         | Married    | 93 (47.0%)  | 171 (52.8%) | 46 (48.4%) |
|                                         | Single     | 35 (17.7%)  | 65 (20.0%)  | 19 (20.0%) |
|                                         | Missing    | 3 (1.5%)    | 1 (0.3%)    | 1 (1.1%)   |
| Employment                              | Unemployed | 74 (37.4%)  | 127 (39.2%) | 46 (48.4%) |
|                                         | Employed   | 111 (56.0%) | 195 (60.2%) | 33 (34.7%) |
|                                         | Missing    | 13 (6.6%)   | 2 (0.6%)    | 16 (16.8%) |
| Previous pregnancies less than 24 weeks | None       | 59 (29.8%)  | 115 (35.5%) | 30 (31.6%) |
|                                         | 1 or more  | 136 (68.7%) | 209 (64.5%) | 63 (66.3%) |
|                                         | Missing    | 3 (1.5%)    | -           | 2 (2.1%)   |
| Previous pregnancies more than 24 weeks | None       | 116 (58.6%) | 199 (61.4%) | 62 (65.3%) |
|                                         | 1 or more  | 74 (37.3%)  | 125 (38.6%) | 27 (28.4%) |
|                                         | Missing    | 8 (4.0%)    | -           | 6 (6.3%)   |
| 1 <sup>st</sup> trimester               |            | 15 (7.6%)   | 21 (6.5%)   | 7 (7.4%)   |
| 2 <sup>nd</sup> trimester               |            | 43 (21.7%)  | 110 (34.0%) | 18 (18.9%) |
| 3 <sup>rd</sup> trimester               |            | 70 (35.4%)  | 138 (42.6%) | 34 (35.8%) |
| Post-partum                             |            | 60 (30.3%)  | 55 (17.0%)  | 35 (36.8%) |
| Missing                                 |            | 10 (5.1%)   | -           | 1 (1.1%)   |

---
