# Supplementary material for: The DiPEP study: an observational study of the diagnostic accuracy of clinical assessment, D‐dimer and chest x‐ray for suspected pulmonary embolism in pregnancy and postpartum
Source: PubMed Central journal article supplement — BJOG. 2018 Jun 14;126(3):383–92. doi: 10.1111/1471-0528.15286 (PMC6519154; doi:10.1111/1471-0528.15286), 2018-06-14
Supplement: BJO-126-383-s005.pdf [file BJO-126-383-s005.pdf]

## Appendix S2: Reference standard classification

The protocol stated that two independent assessors, blind to clinical predictors and blood results, will classify participants as having PE using diagnostic imaging results, details of adverse events and details of treatments given. Disagreements will be resolved through adjudication by a third assessor.

We structured the process of classification to ensure that it was transparent and reproducible. We provided each independent assessor with details of the diagnostic imaging report, anticoagulant treatment given and 30 day follow-up events and asked them to classify the information using the following codes.

Classify imaging as

I1a: Imaging is reported as showing PE (including any qualified statement suggesting probable PE but excluding isolated subsegmental PE) or DVT

I1b: Imaging only shows isolated subsegmental PE

I2: Imaging is reported as equivocal, uninterpretable or indeterminate

I3: Imaging is reported as negative for PE

I4: Lung imaging is not done

Classify treatment as

T1: Therapeutic anticoagulation for more than one week

T2: Anything less than T1

Classify follow-up as

F1: Subsequent PE diagnosis during 30-day FU or PE is confirmed at surgery or post-mortem

F2: No subsequent PE diagnosis during 30-day FU

We then used these codes to determine whether PE was diagnosed or ruled out, and whether the woman was included in the primary and secondary analyses.

| Imaging | Treatment | Follow-up | Primary analysis | Secondary 1 | Secondary 2 | Secondary 3 |
|---------|-----------|-----------|------------------|-------------|-------------|-------------|
| I1a     | T1 or T2  | F1 or F2  | PE               | PE          | PE          | PE          |
| I1b     | T1 or T2  | F1 or F2  | PE               | PE          | PE          | Exclude     |
| I2      | T1        | F1        | PE               | PE          | PE          | PE          |
| I2      | T1        | F2        | Exclude          | PE          | Exclude     | Exclude     |
| I2      | T2        | F1        | PE               | PE          | PE          | PE          |
| I2      | T2        | F2        | No PE            | No PE       | No PE       | No PE       |
| I3      | T1        | F1        | PE               | PE          | PE          | PE          |
| I3      | T1        | F2        | No PE            | No PE       | No PE       | No PE       |
| I3      | T2        | F1        | PE               | PE          | PE          | PE          |
| I3      | T2        | F2        | No PE            | No PE       | No PE       | No PE       |
| I4      | T1        | F1        | PE               | PE          | PE          | PE          |
| I4      | T1        | F2        | Exclude          | PE          | Exclude     | Exclude     |
| I4      | T2        | F1        | PE               | PE          | PE          | PE          |
| I4      | T2        | F2        | Exclude          | Exclude     | No PE       | Exclude     |

Secondary analyses: (1) Include clinically diagnosed PE; (2) Include clinically ruled out PE; (3) Exclude subsegmental PE

The process resulted in the following classifications:

| Imaging | Treatment | Follow-up | UKOSS | Suspected PE | Non-recruited |
|---------|-----------|-----------|-------|--------------|---------------|
| I1a     | T1        | F1        | 0     | 0            | 0             |
| I1a     | T1        | F2        | 146   | 17           | 3**           |
| I1a     | T2        | F1        | 1     | 0            | 0             |
| I1a     | T2        | F2        | 7     | 0            | 0             |
| I1b     | T1        | F1        | 0     | 0            | 0             |
| I1b     | T1        | F2        | 7     | 1            | 3*            |
| I1b     | T2        | F1        | 0     | 0            | 0             |
| I1b     | T2        | F2        | 0     | 0            | 0             |
| I2      | T1        | F1        | 0     | 0            | 0             |
| I2      | T1        | F2        | 29    | 3            | 4             |
| I2      | T2        | F1        | 0     | 0            | 0             |
| I2      | T2        | F2        | 0     | 5            | 2             |
| I3      | T1        | F1        | 0     | 0            | 0             |
| I3      | T1        | F2        | 0     | 19           | 4             |
| I3      | T2        | F1        | 0     | 0            | 0             |
| I3      | T2        | F2        | 0     | 235          | 67            |
| I4      | T1        | F1        | 1     | 0            | 0             |
| I4      | T1        | F2        | 6     | 2            | 1             |
| I4      | T2        | F1        | 1     | 0            | 0             |
| I4      | T2        | F2        | 0     | 42           | 11            |

|         | UKOSS |       | Suspected PE |       | Non-recruited |       |
|---------|-------|-------|--------------|-------|---------------|-------|
|         | PE    | No PE | PE           | No PE | PE            | No PE |
| Primary | 163   | 0     | 18           | 259   | 6***          | 73    |
| S1      | 198   | 0     | 23           | 259   | 11***         | 73    |
| S2      | 163   | 0     | 18           | 301   | 6***          | 84    |
| S3      | 156   | 0     | 17           | 259   | 3*            | 73    |

\*Includes one case duplicated in UKOSS

\*\*Includes two cases duplicated in UKOSS

\*\*\*Includes three cases duplicated in UKOSS
