# Supplementary material for: The DiPEP study: an observational study of the diagnostic accuracy of clinical assessment, D‐dimer and chest x‐ray for suspected pulmonary embolism in pregnancy and postpartum
Source: PubMed Central journal article supplement — BJOG. 2018 Jun 14;126(3):383–92. doi: 10.1111/1471-0528.15286 (PMC6519154; doi:10.1111/1471-0528.15286), 2018-06-14

### Appendix S3: Diagnostic performance of the clinical decision rules

Figure 1: Number of women with and without PE and excluded (primary analysis) by the primary consensus rule score

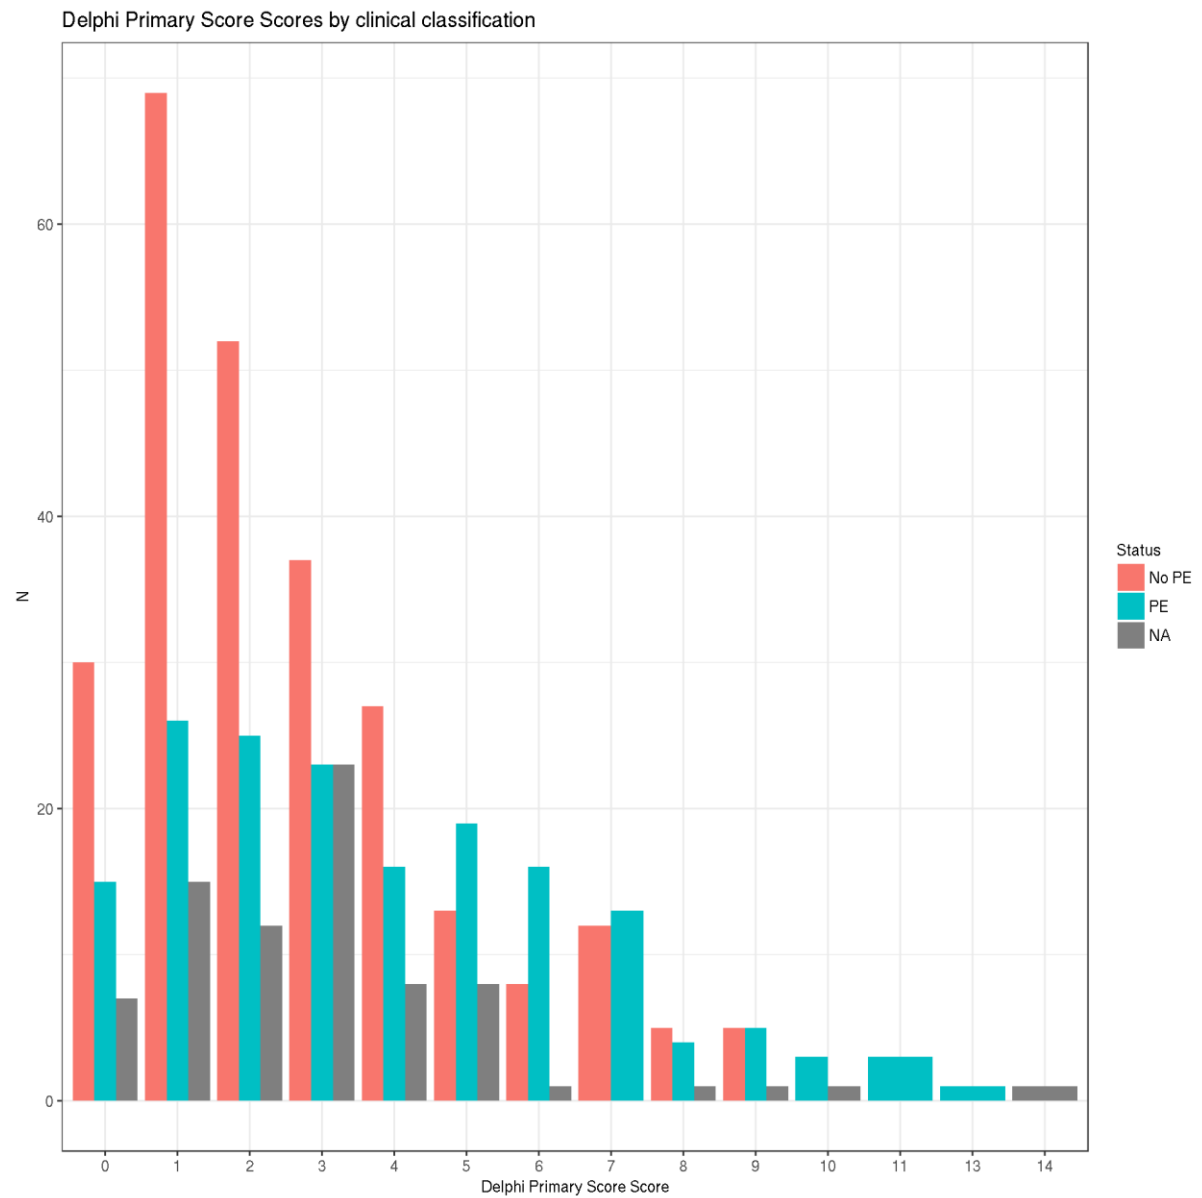

Figure 2: Number of women with and without PE and excluded (primary analysis) by the sensitive consensus rule score

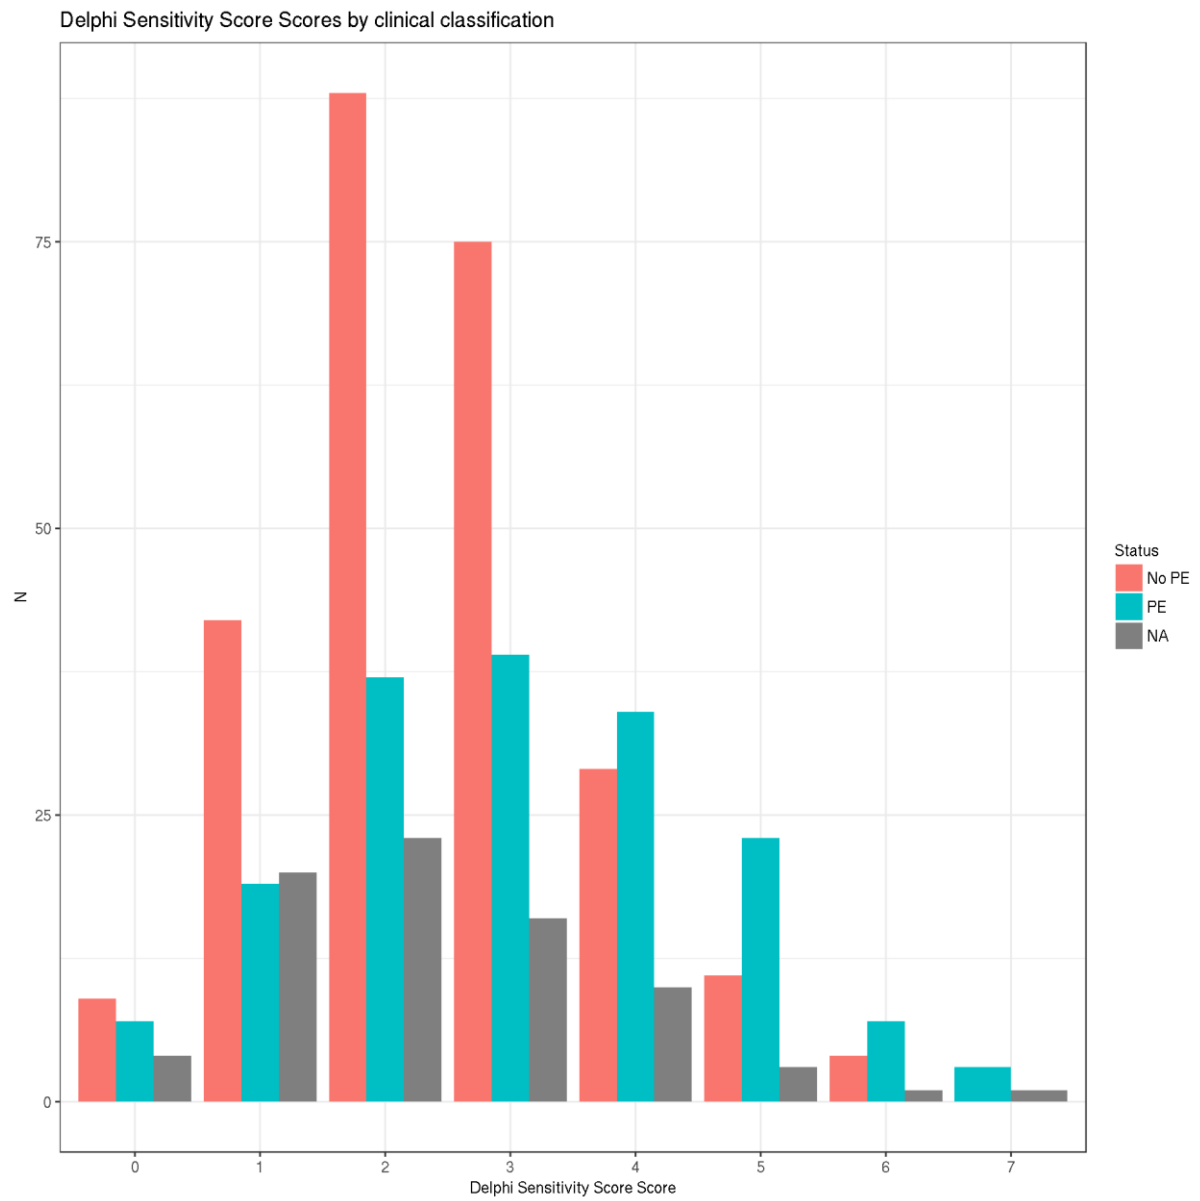

Figure 3: Number of women with and without PE and excluded (primary analysis) by the specific consensus rule score

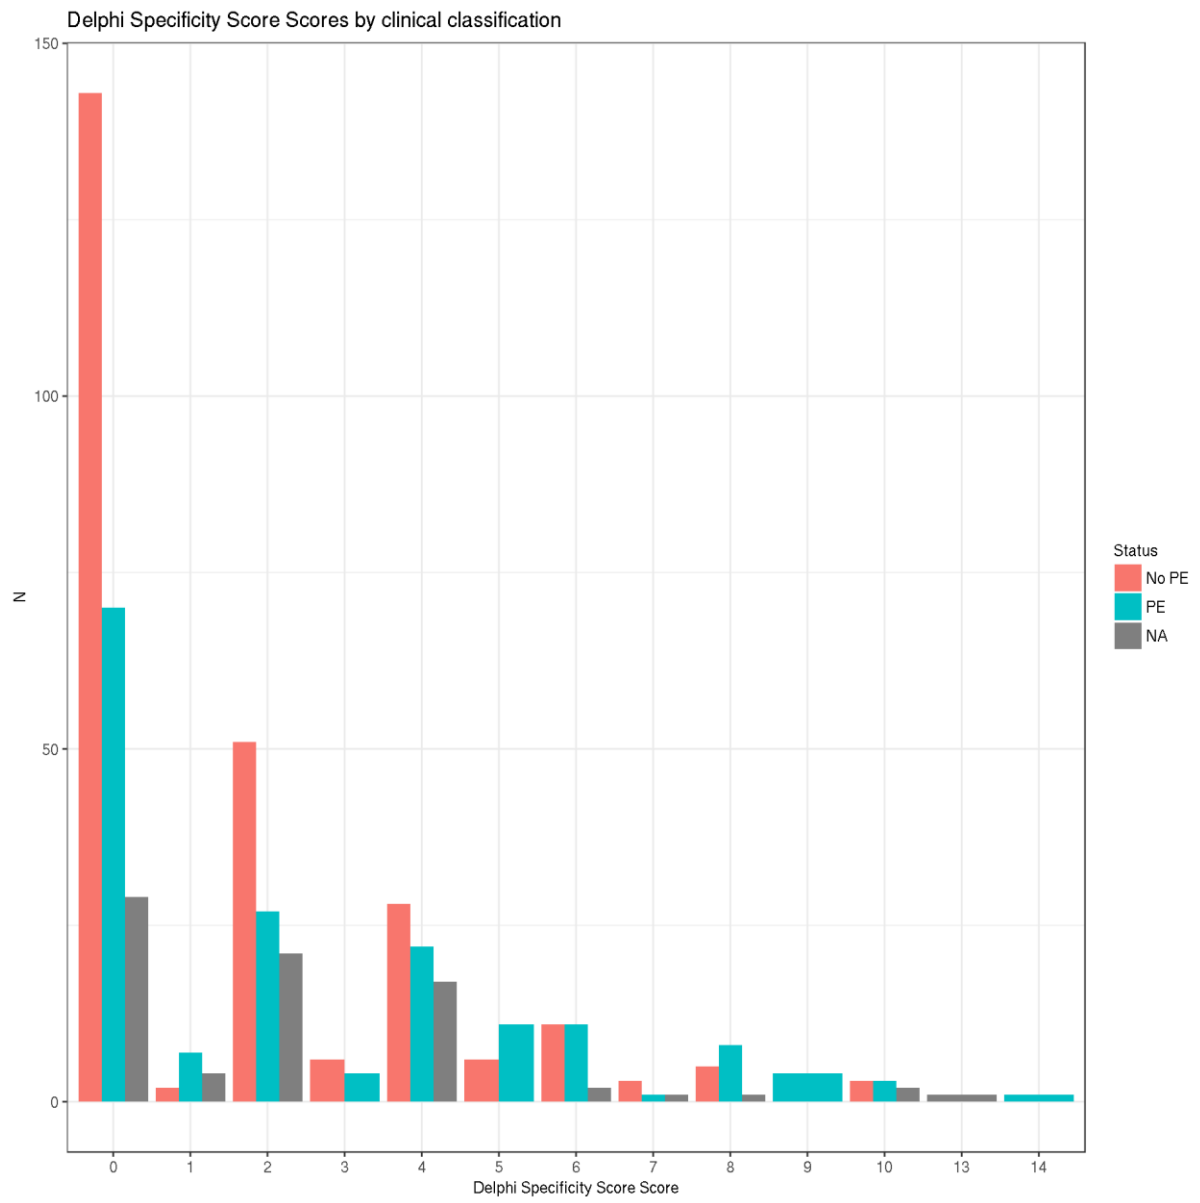

Figure 4: Number of women with and without PE and excluded (primary analysis) by the PERC rule score

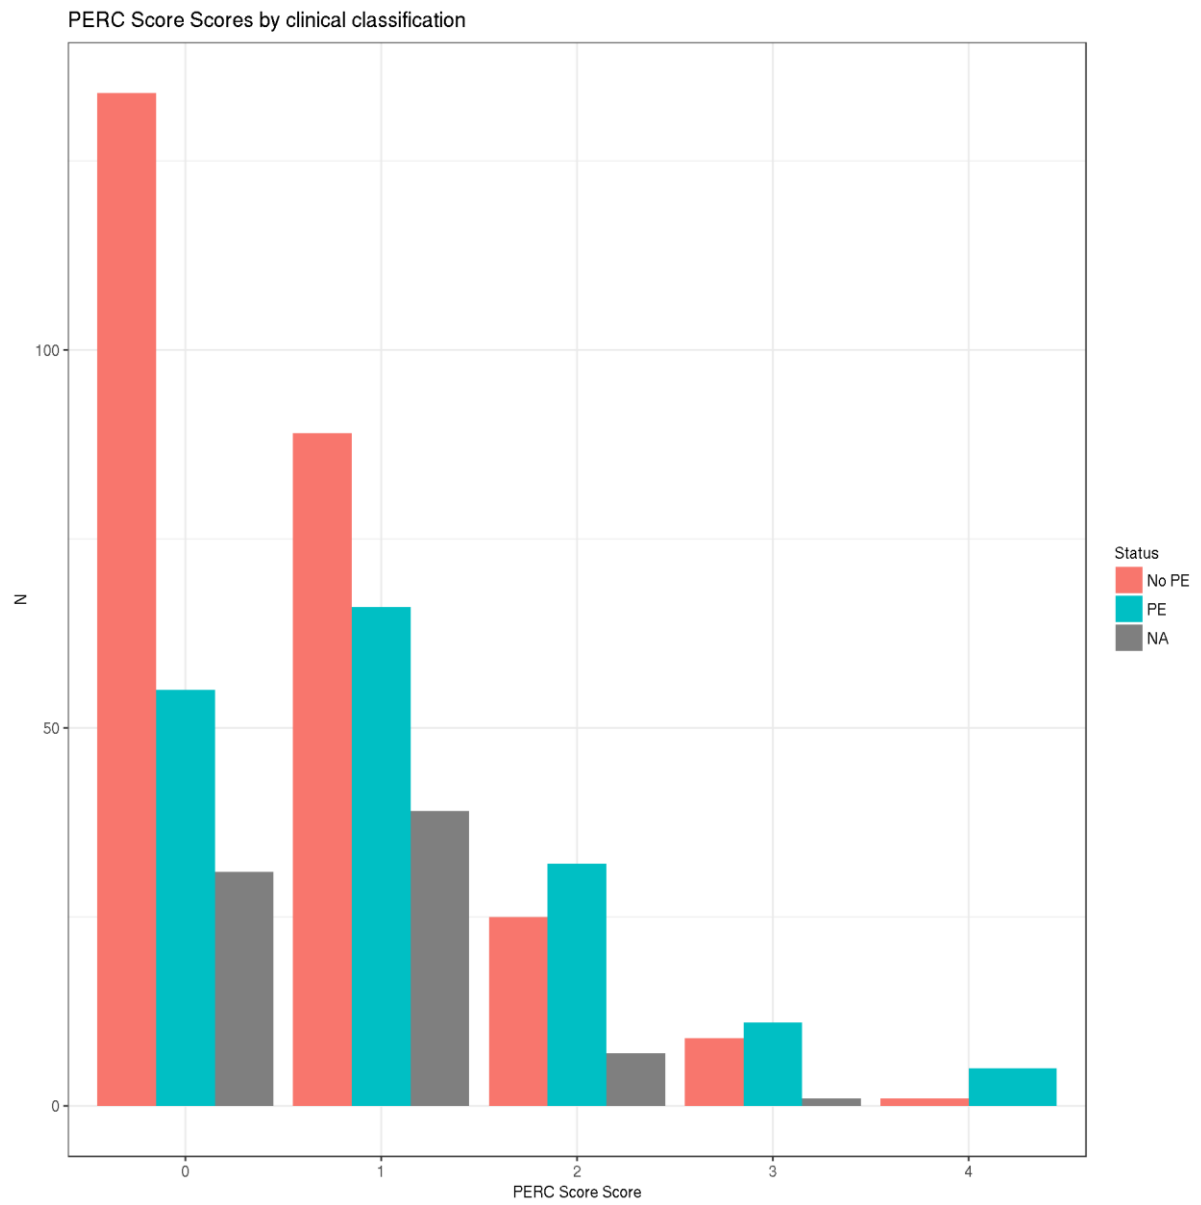

Figure 5: Number of women with and without PE and excluded (primary analysis) by the Simplified Geneva Score

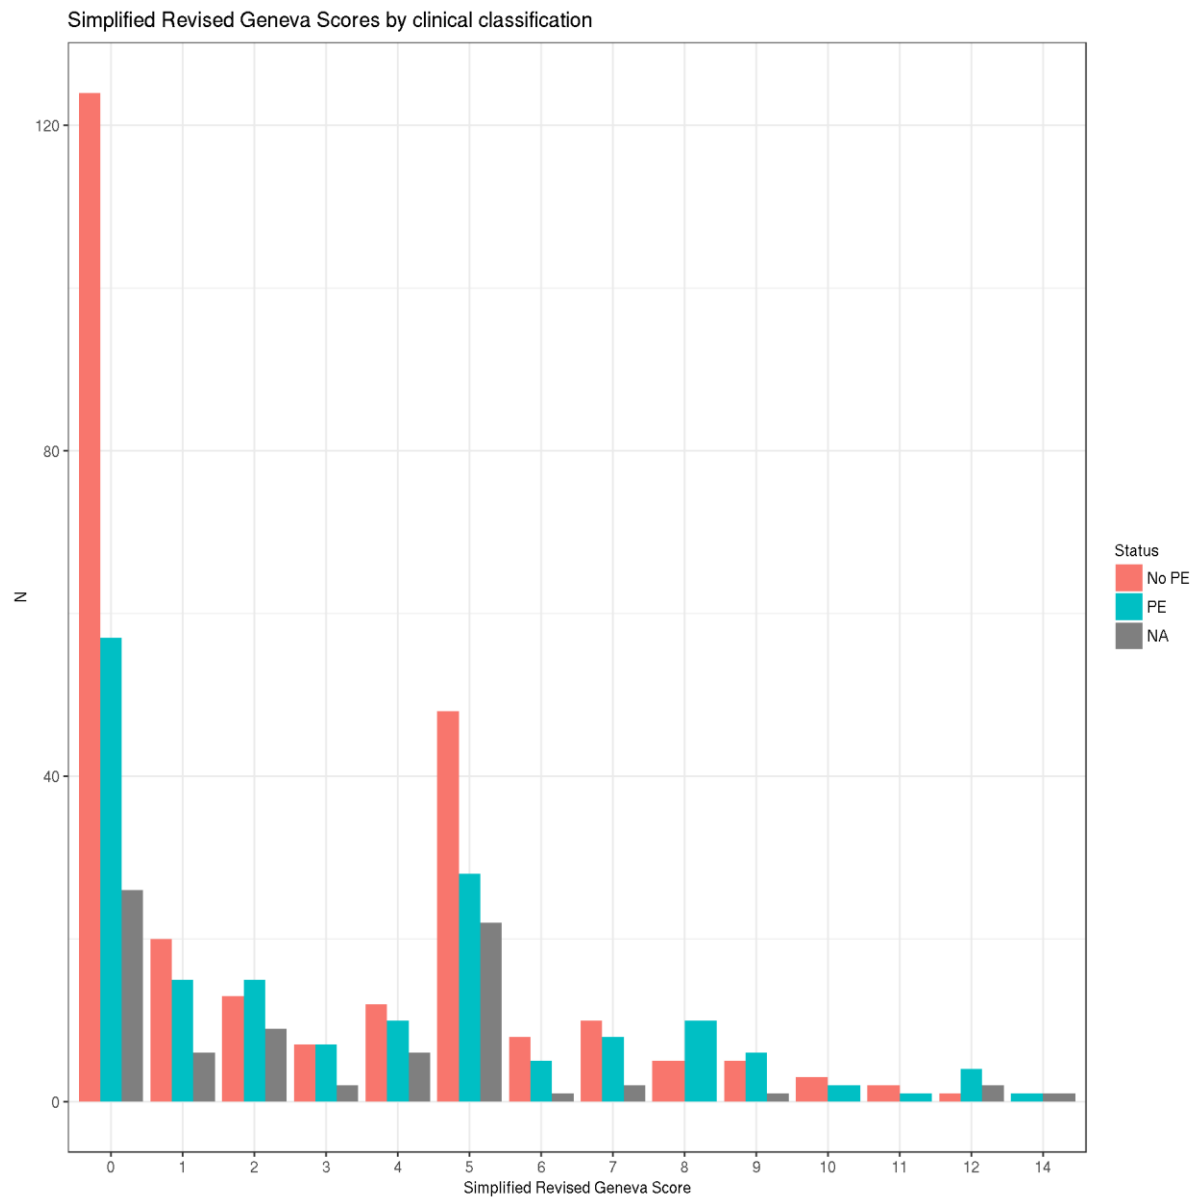

Figure 6: Number of women with and without PE and excluded (primary analysis) by the Well's criteria (permissive application of PE likely)

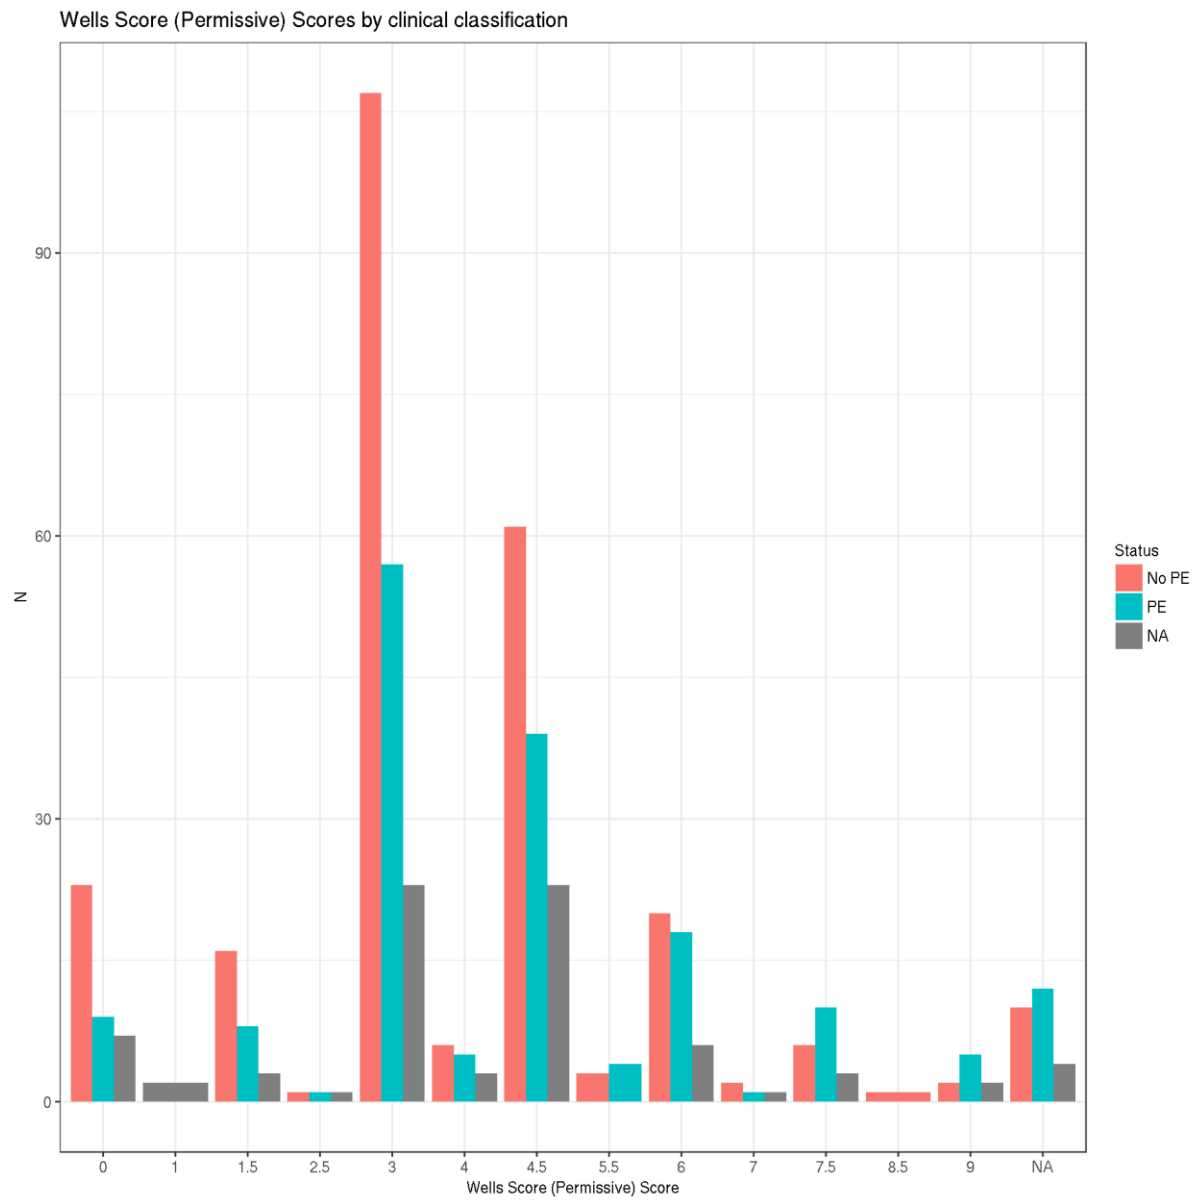

Figure 7: Number of women with and without PE and excluded (primary analysis) by the Well's criteria (strict application of PE likely)

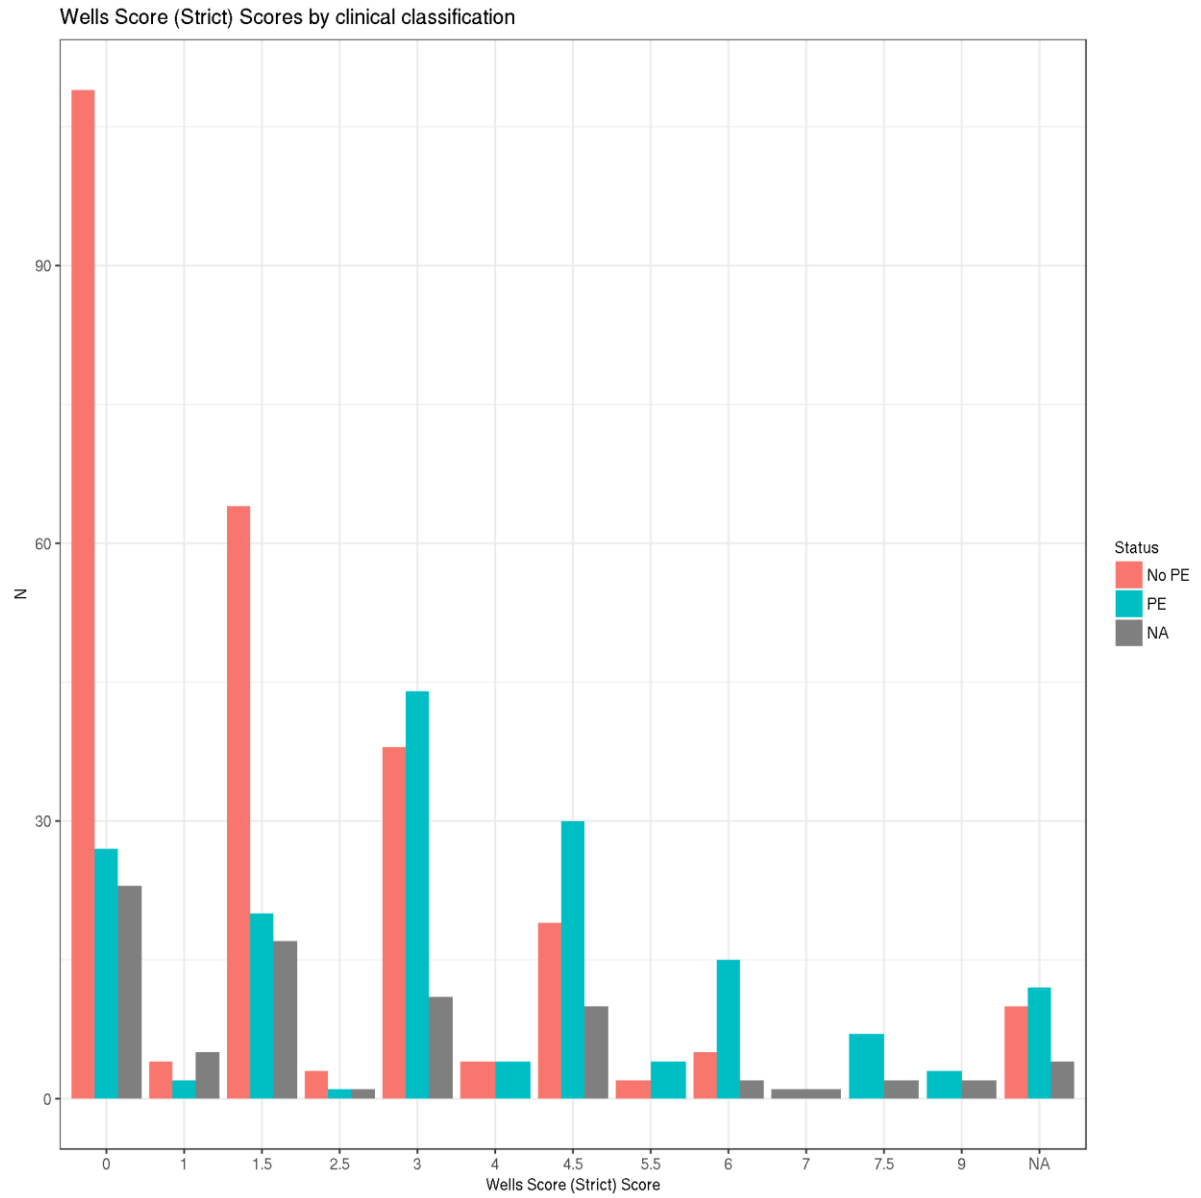

Supplement: BJO-126-383-s006.pdf [file BJO-126-383-s006.pdf]
