# Supplementary material for: The DiPEP study: an observational study of the diagnostic accuracy of clinical assessment, D‐dimer and chest x‐ray for suspected pulmonary embolism in pregnancy and postpartum
Source: PubMed Central journal article supplement — BJOG. 2018 Jun 14;126(3):383–92. doi: 10.1111/1471-0528.15286 (PMC6519154; doi:10.1111/1471-0528.15286), 2018-06-14
Supplement: BJO-126-383-s007.pdf [file BJO-126-383-s007.pdf]

#### Appendix S4: Results of secondary analyses

Table 1 shows the p-values for univariable analysis. There was little difference between the analyses. Some variables were significant predictors ( $p < 0.05$ ) on secondary analysis that were not significant predictors on primary analysis, for example giving up smoking during the pregnancy, history of varicose veins and history of thrombosis, but this simply reflected the p-value moving to the other side of the 0.05 threshold, presumably due to a slightly larger sample size.

**Table 1: Univariable analysis (p-values)**

| Variable                                     | Primary analysis | Secondary with clinically diagnosed PE | Secondary with clinically ruled out PE | Secondary with subsegmental PE excluded |
|----------------------------------------------|------------------|----------------------------------------|----------------------------------------|-----------------------------------------|
| Age (continuous)                             | 0.179            | 0.307                                  | 0.166                                  | 0.187                                   |
| Age over 35                                  | 0.176            | 0.247                                  | 0.177                                  | 0.256                                   |
| BMI (Continuous)                             | 0.372            | 0.587                                  | 0.256                                  | 0.253                                   |
| BMI 30 or more                               | 0.942            | 0.631                                  | 0.775                                  | 0.781                                   |
| Ex-smoker (Prior)                            | 0.837            | 0.901                                  | 0.842                                  | 0.792                                   |
| Ex-smoker (During)                           | 0.082            | 0.082                                  | 0.035                                  | 0.080                                   |
| Current Smoker                               | 0.279            | 0.159                                  | 0.318                                  | 0.354                                   |
| Pregnancies < 24 weeks (Continuous)          | 0.509            | 0.386                                  | 0.679                                  | 0.440                                   |
| 1 or more pregnancy < 24 weeks               | 0.980            | 0.937                                  | 0.776                                  | 0.883                                   |
| Pregnancies > 24 weeks (Continuous)          | 0.017            | 0.014                                  | 0.014                                  | 0.017                                   |
| 1 or more pregnancy > 24 weeks               | 0.198            | 0.243                                  | 0.217                                  | 0.224                                   |
| Previous pregnancy problems                  | 0.442            | 0.888                                  | 0.252                                  | 0.493                                   |
| Family History of VTE                        | 0.205            | 0.125                                  | 0.324                                  | 0.160                                   |
| History of Varicose Veins                    | 0.045            | 0.084                                  | 0.033                                  | 0.056                                   |
| History of IV Drug use                       | 0.800            | 0.910                                  | 0.719                                  | 0.775                                   |
| Known Thrombophilia                          | 0.745            | 0.993                                  | 0.934                                  | 0.801                                   |
| Surgery in previous 4 weeks                  | 0.001            | 0.003                                  | 0.000                                  | 0.000                                   |
| Injury in last 4 weeks                       | 0.959            | 0.845                                  | 0.910                                  | 0.998                                   |
| Previous VTE                                 | 0.073            | 0.092                                  | 0.025                                  | 0.081                                   |
| Other previous medical problem               | 0.829            | 0.989                                  | 0.760                                  | 0.955                                   |
| Other previous medical problem (VTE-related) | 0.941            | 0.941                                  | 0.941                                  | 0.941                                   |

|                                                     |       |       |       |       |
|-----------------------------------------------------|-------|-------|-------|-------|
| 2nd Trimester                                       | 0.234 | 0.573 | 0.064 | 0.185 |
| 3rd Trimester                                       | 0.324 | 0.635 | 0.196 | 0.283 |
| Post-Partum                                         | 0.101 | 0.105 | 0.168 | 0.142 |
| Multiple Pregnancy                                  | 0.191 | 0.097 | 0.299 | 0.220 |
| Long-haul travel during pregnancy                   | 0.006 | 0.002 | 0.011 | 0.007 |
| 3 or more days Immobility/bed rest during pregnancy | 0.887 | 0.988 | 0.970 | 0.995 |
| Received thromboprophylaxis                         | 0.000 | 0.000 | 0.000 | 0.000 |
| Previous thrombotic event this pregnancy            | 0.226 | 0.085 | 0.157 | 0.203 |
| Other problem with this pregnancy                   | 0.006 | 0.095 | 0.003 | 0.006 |
| Other problem with this pregnancy (VTE-related)     | 0.713 | 0.815 | 0.903 | 0.772 |
| Presenting : Pleuritic chest pain                   | 0.842 | 0.774 | 0.982 | 0.767 |
| Presenting : Non-pleuritic chest pain               | 0.457 | 0.391 | 0.464 | 0.405 |
| Presenting : Shortness of breath (Exertion)         | 0.520 | 0.895 | 0.796 | 0.317 |
| Presenting : Shortness of breath (Rest)             | 0.142 | 0.135 | 0.104 | 0.239 |
| Presenting : Haemoptysis                            | 0.129 | 0.109 | 0.320 | 0.103 |
| Presenting : Cough                                  | 0.988 | 0.913 | 0.772 | 0.940 |
| Presenting : Syncope                                | 0.218 | 0.090 | 0.189 | 0.291 |
| Presenting : Palpitations                           | 0.598 | 0.424 | 0.521 | 0.595 |
| Presenting : Other                                  | 0.914 | 0.771 | 0.888 | 0.989 |
| Temperature > 37.5                                  | 0.020 | 0.017 | 0.022 | 0.015 |
| Temperature (Continuous)                            | 0.003 | 0.002 | 0.001 | 0.003 |
| Diastolic < 50 mmHg                                 | 0.221 | 0.195 | 0.162 | 0.202 |
| Diastolic (Continuous)                              | 0.256 | 0.503 | 0.210 | 0.265 |
| Systolic < 90 mmHg                                  | 0.205 | 0.164 | 0.162 | 0.191 |
| Systolic (Continuous)                               | 0.322 | 0.137 | 0.480 | 0.350 |
| O2 Saturation < 94%                                 | 0.000 | 0.001 | 0.000 | 0.000 |
| O2 Saturation (Continuous)                          | 0.000 | 0.001 | 0.000 | 0.000 |
| Respiratory Rate > 24/min                           | 0.919 | 0.956 | 0.722 | 0.798 |
| Respiratory Rate (Continuous)                       | 0.948 | 0.841 | 0.592 | 0.869 |

|                                                            |       |       |       |       |
|------------------------------------------------------------|-------|-------|-------|-------|
| Heart rate >100/min (110/min 3 <sup>rd</sup> trimester)    | 0.556 | 0.618 | 0.615 | 0.524 |
| Heart Rate (Continuous)                                    | 0.126 | 0.063 | 0.126 | 0.084 |
| Clinical signs of DVT                                      | 0.199 | 0.104 | 0.418 | 0.274 |
| PE related ECG abnormality                                 | 0.579 | 0.580 | 0.760 | 0.631 |
| PE Related CXR abnormality                                 | 0.010 | 0.018 | 0.007 | 0.019 |
| Other CXR abnormality                                      | 0.001 | 0.001 | 0.001 | 0.001 |
| PE is most likely diagnosis OR equally likely (permissive) | 0.156 | 0.156 | 0.156 | 0.156 |
| PE is most likely diagnosis OR equally likely (strict)     | 0.000 | 0.000 | 0.000 | 0.000 |

Table 2 shows the AUROC estimates for the clinical decision rules. The results for secondary analyses were similar to the primary analysis.

**Table 2: AUROC estimates for the clinical decision rules**

| Decision rule             | Primary analysis | Secondary with clinically diagnosed PE | Secondary with clinically ruled out PE | Secondary with subsegmental PE excluded |
|---------------------------|------------------|----------------------------------------|----------------------------------------|-----------------------------------------|
| Primary consensus         | 0.626            | 0.621                                  | 0.626                                  | 0.629                                   |
| Sensitive consensus       | 0.620            | 0.599                                  | 0.629                                  | 0.622                                   |
| Specific consensus        | 0.589            | 0.592                                  | 0.582                                  | 0.592                                   |
| PERC                      | 0.621            | 0.610                                  | 0.619                                  | 0.623                                   |
| Simplified Revised Geneva | 0.579            | 0.575                                  | 0.572                                  | 0.579                                   |
| Well's (permissive)*      | 0.577            | 0.580                                  | 0.577                                  | 0.578                                   |
| Well's (strict)*          | 0.732            | 0.716                                  | 0.728                                  | 0.731                                   |

Table 3 shows the results for D-dimer analysis using the hospital laboratory measurements. Inclusion of women with clinically diagnosed PE and exclusion of women with subsegmental PE resulted in small changes to sensitivity, while inclusion of women with clinically ruled out PE resulted in a small increase in specificity. None of the estimates in the secondary analysis differed in a meaningful way to the primary analysis.

**Table 3: D-dimer (hospital) sensitivity and specificity**

| Threshold | Parameter   | Primary analysis | Secondary with clinically diagnosed PE | Secondary with clinically ruled out PE | Secondary with subsegmental PE excluded |
|-----------|-------------|------------------|----------------------------------------|----------------------------------------|-----------------------------------------|
| Standard  | Sensitivity | 0.884            | 0.878<br>0.7445 to 0.945               | 0.884                                  | 0.878<br>0.730 to 0.954                 |

|                       |             |                                   |                                   |                                   |                                   |
|-----------------------|-------------|-----------------------------------|-----------------------------------|-----------------------------------|-----------------------------------|
|                       |             | 0.741 to 0.956<br>38/43           | 43/49                             | 0.741 to 0.956<br>38/43           | 36/41                             |
|                       | Specificity | 0.088<br>0.047 to 0.156<br>11/125 | 0.088<br>0.047 to 0.156<br>11/125 | 0.092<br>0.052 to 0.156<br>13/141 | 0.088<br>0.047 to 0.156<br>11/125 |
| Gestation<br>specific | Sensitivity | 0.698<br>0.537 to 0.823<br>30/43  | 0.694<br>0.544 to 0.813<br>34/49  | 0.698<br>0.537 to 0.823<br>30/43  | 0.707<br>0.543 to 0.833<br>29/41  |
|                       | Specificity | 0.328<br>0.248 to 0.419<br>41/125 | 0.328<br>0.248 to 0.419<br>41/125 | 0.355<br>0.277 to 0.440<br>50/141 | 0.328<br>0.248 to 0.419<br>41/125 |
