# Supplementary material for: The DiPEP study: an observational study of the diagnostic accuracy of clinical assessment, D‐dimer and chest x‐ray for suspected pulmonary embolism in pregnancy and postpartum
Source: PubMed Central journal article supplement — BJOG. 2018 Jun 14;126(3):383–92. doi: 10.1111/1471-0528.15286 (PMC6519154; doi:10.1111/1471-0528.15286), 2018-06-14
Supplement: BJO-126-383-s008.pdf [file BJO-126-383-s008.pdf]

## Appendix S5: The DiPEP Research Group

### Project Management Group

|                               |                                                   |
|-------------------------------|---------------------------------------------------|
| Amanda Loban                  | University of Sheffield                           |
| Prof. Beverley Hunt           | Guy's & St Thomas's NHS Foundation Trust          |
| Prof. Catherine Nelson-Piercy | Guy's & St Thomas's NHS Foundation Trust          |
| Daniel Pollard                | University of Sheffield                           |
| Ellen Bradley                 | University of Sheffield                           |
| Prof. Fiona Lecky             | University of Sheffield                           |
| Dr Gordon Fuller              | University of Sheffield                           |
| Dr. Judith Cohen              | University of Sheffield                           |
| Kimberley Horspool            | University of Sheffield                           |
| Kiran Parmar                  | Guy's & St Thomas's NHS Foundation Trust          |
| Prof. Marian Knight           | University of Oxford                              |
| Prof. Matthew Stevenson       | University of Sheffield                           |
| Mike Bradburn                 | University of Sheffield                           |
| Neil Shephard                 | University of Sheffield                           |
| Prof. Steve Goodacre          | University of Sheffield                           |
| Dr. Steven Thomas             | Sheffield Teaching Hospitals NHS Foundation Trust |
| Dr. Wee-Shian Chan            | BC Women's Hospital and Health Centre             |

### Trial Steering Committee

|                      |                                |
|----------------------|--------------------------------|
| Dr Andrew Thomson    | Royal Alexandra Hospital       |
| Franchesca Cullinane | PPI Lay Representative         |
| Kimberley Horspool   | University of Sheffield        |
| Shan Bennett         | PPI Lay Representative         |
| Dr Steve Crane       | York District General Hospital |
| Prof. Steve Goodacre | University of Sheffield        |
| Dr Sue Pavord        | John Radcliffe Hospital        |
| Dr Trevor Cox        | Liverpool Cancer Trials Unit   |

### Co-Applicants

|                               |                                                   |
|-------------------------------|---------------------------------------------------|
| Prof. Marian Knight           | University of Oxford                              |
| Prof. Matthew Stevenson       | University of Sheffield                           |
| Dr. Wee-Shian Chan            | BC Women's Hospital and Health Centre             |
| Prof. Beverley Hunt           | Guy's & St Thomas's NHS Foundation Trust          |
| Prof. Catherine Nelson-Piercy | Guy's & St Thomas's NHS Foundation Trust          |
| Prof. Michael Campbell        | University of Sheffield                           |
| Dr. Judith Cohen              | University of Sheffield                           |
| Dr. Steven Thomas             | Sheffield Teaching Hospitals NHS Foundation Trust |
| Prof. Fiona Lecky             | University of Sheffield                           |

#### Local Investigators

|                                     |                                                              |
|-------------------------------------|--------------------------------------------------------------|
| Prof. Steve Goodacre                | University of Sheffield                                      |
| Prof. Derek Tuffnell                | Bradford Teaching Hospitals NHS Foundation Trust             |
| Dr Richard Parris                   | Bolton NHS Foundation Trust,                                 |
| Dr William Townend                  | Hull and East Yorkshire Hospitals NHS Trust                  |
| Dr Etienne Ciantar                  | Leeds Teaching Hospitals NHS Trust                           |
| Dr Richard Body                     | Central Manchester University Hospitals NHS Foundation Trust |
| Prof. Cathy Nelson Piercy           | Guy's & St Thomas's NHS Foundation Trust                     |
| Prof. Tim Harris                    | Bart's Health NHS Trust                                      |
| Dr Chris Vorwerk                    | Portsmouth Hospitals NHS Trust                               |
| Dr Gillian Swallow/ Dr Judith Moore | Nottingham University Hospitals NHS Trust                    |
| Dr Andy Walden                      | Royal Berkshire NHS Foundation Trust                         |
