# Supplementary figures and images for: The DiPEP study: an observational study of the diagnostic accuracy of clinical assessment, D‐dimer and chest x‐ray for suspected pulmonary embolism in pregnancy and postpartum
Source: PubMed Central journal article supplement — BJOG. 2018 Jun 14;126(3):383–92. doi: 10.1111/1471-0528.15286 (PMC6519154; doi:10.1111/1471-0528.15286), 2018-06-14

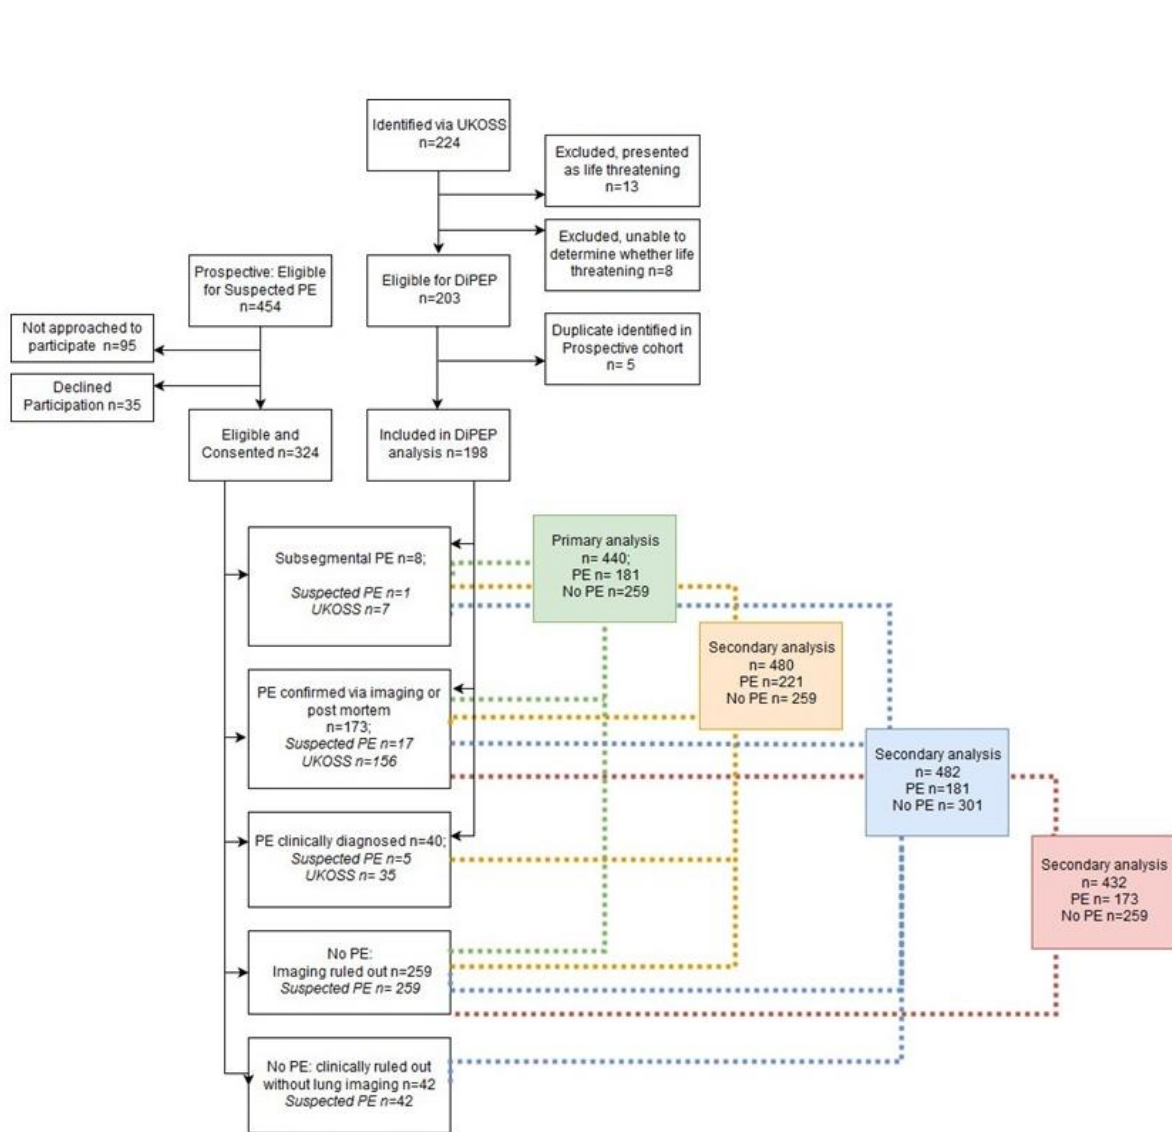

**Figure S1:** Recruitment flow and analysis populations

Supplement: BJO-126-383-s001.pdf [file BJO-126-383-s001.pdf]

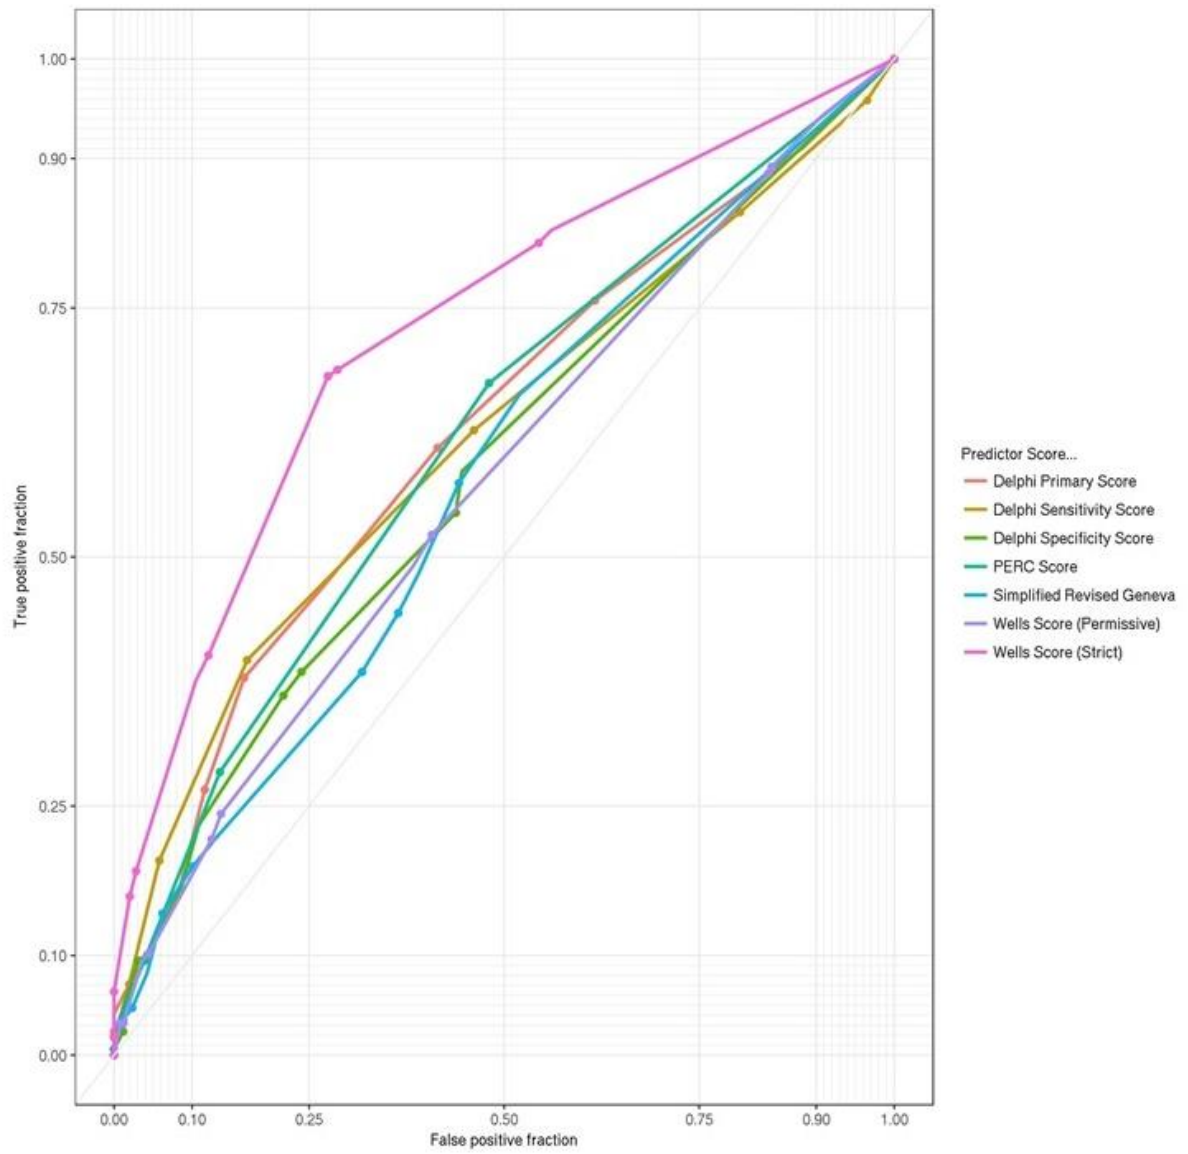

**Figure S2:** ROC curves for clinical decision rules

Supplement: BJO-126-383-s002.pdf [file BJO-126-383-s002.pdf]
